# Supplementary material for: The Combination of Selenium and LED Light Quality Affects Growth and Nutritional Properties of Broccoli Sprouts
Source: PubMed Central journal article supplement (PMC7587582; doi:10.3390/molecules25204788), 2020-10-19
Supplement: molecules-25-04788-s001.pdf [file molecules-25-04788-s001.pdf]

### Supplementary Materials

**Supplementary Table S1** Details of treatments: The light quality and concentration of sodium selenite ( $\text{Na}_2\text{SeO}_3$ ) solution for this experiment. The photosynthetic photon flux density (PPFD) was maintained at  $60 \mu\text{mol m}^{-2}\text{s}^{-1}$ .

| Treatment | Red/Blue/Green LED ratios | Selenium Supplement                                  |
|-----------|---------------------------|------------------------------------------------------|
| 1R1B1G    | Red: Blue: Green=1:1:1    | \                                                    |
| 1R1B1G+Se | Red: Blue: Green=1:1:1    | 100 $\mu\text{mol L}^{-1}$ $\text{Na}_2\text{SeO}_3$ |
| 1R1B+Se   | Red: Blue=1:1             | 100 $\mu\text{mol L}^{-1}$ $\text{Na}_2\text{SeO}_3$ |
| 1R2B+Se   | Red: Blue=1:2             | 100 $\mu\text{mol L}^{-1}$ $\text{Na}_2\text{SeO}_3$ |
| 2R1B+Se   | Red: Blue=2:1             | 100 $\mu\text{mol L}^{-1}$ $\text{Na}_2\text{SeO}_3$ |

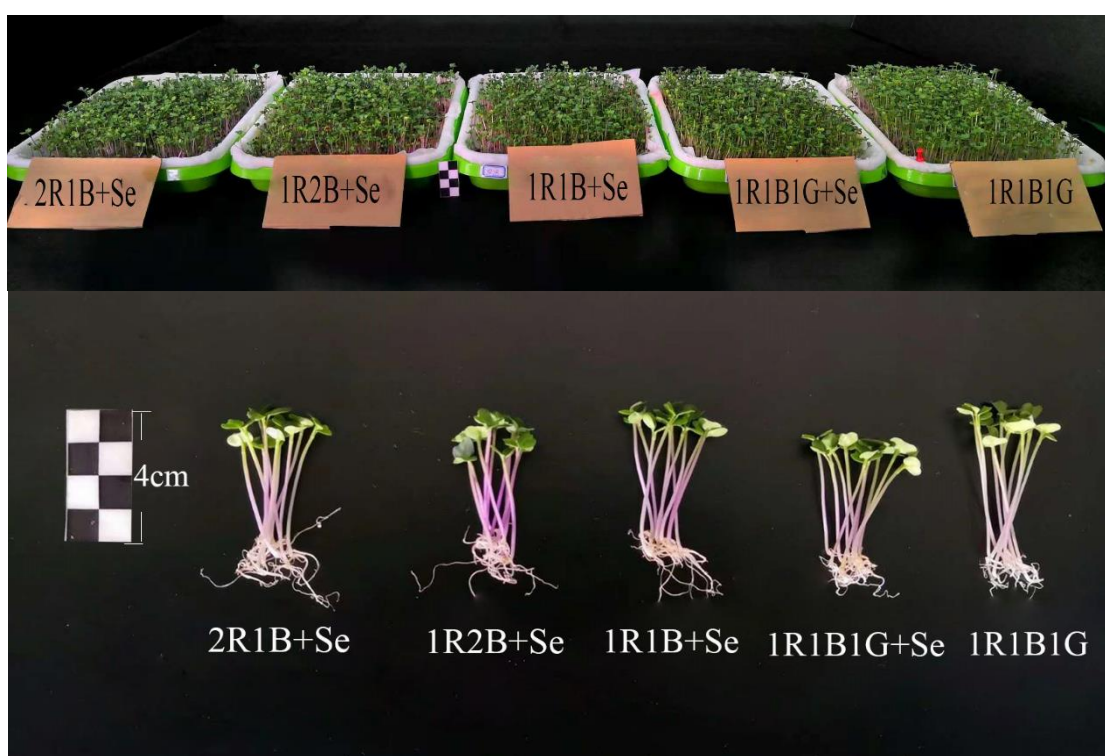

**Supplementary Figure S1** The phenotype of broccoli sprouts under a combination of selenium and LED light quality treatments.
